# Supplementary material for: Conformational stabilities of iminoallantoin and its base pairs in DNA: implications for mutagenicity
Source: Royal Society of Chemistry journal article supplement (doi:10.1039/c6cp02212j), 2016-01-01
Supplement: c6cp02212j1.pdf [file c6cp02212j1.pdf]

## Supporting Information

### **Conformational Stabilities of Iminoallantoin and its Base Pairs in DNA: Implications for Mutagenicity**

N.R. Jena<sup>1\*</sup>, Manju Bansal<sup>2</sup>, P.C. Mishra<sup>3</sup>

<sup>1</sup>Discipline of Natural Sciences, Indian Institute of Information Technology, Design and  
Manufacturing, Jabalpur-482005

<sup>2</sup>Molecular Biophysics Unit, Indian Institute of Science, Bangalore-560012

<sup>3</sup>Department of Physics, Banaras Hindu University, Varanasi-221005

---

\*Corresponding Author's Email Address: [nrjena@iiitdmj.ac.in](mailto:nrjena@iiitdmj.ac.in)

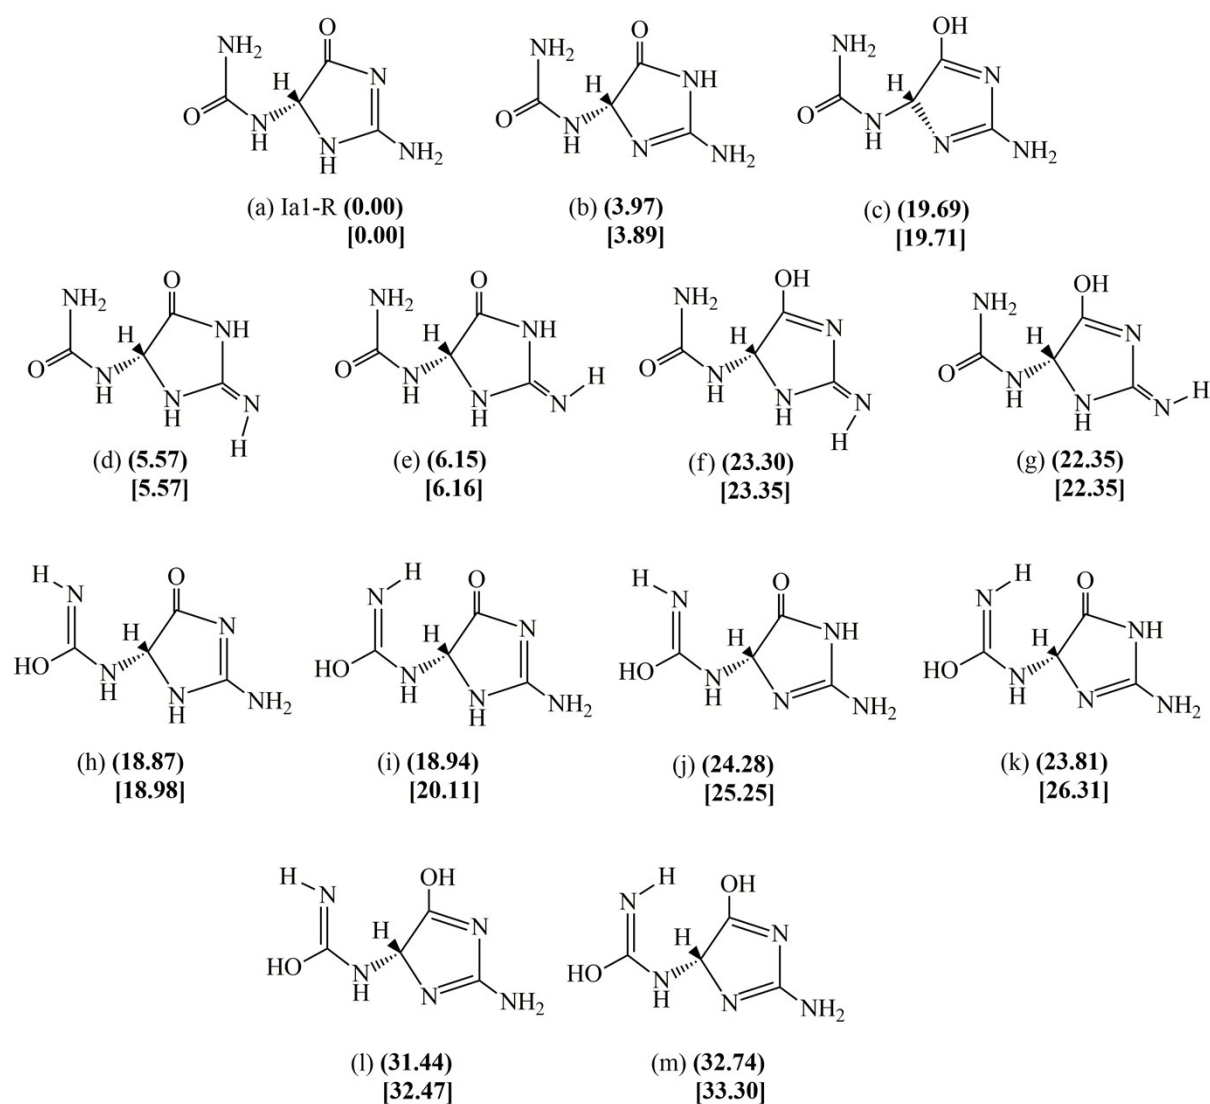

Fig. S1: Structures of different tautomers of Ia1 in the R-stereoisomeric conformation (Ia1-R). The relative ZPE-corrected total energies (kcal/mol) calculated with respect to (a) by employing B3LYP/6-31+G\* level of theory are shown in parentheses. The energies shown in brackets correspond to the equivalent tautomers of Ia1 in the S-stereoisomeric conformation (Ia1-S).

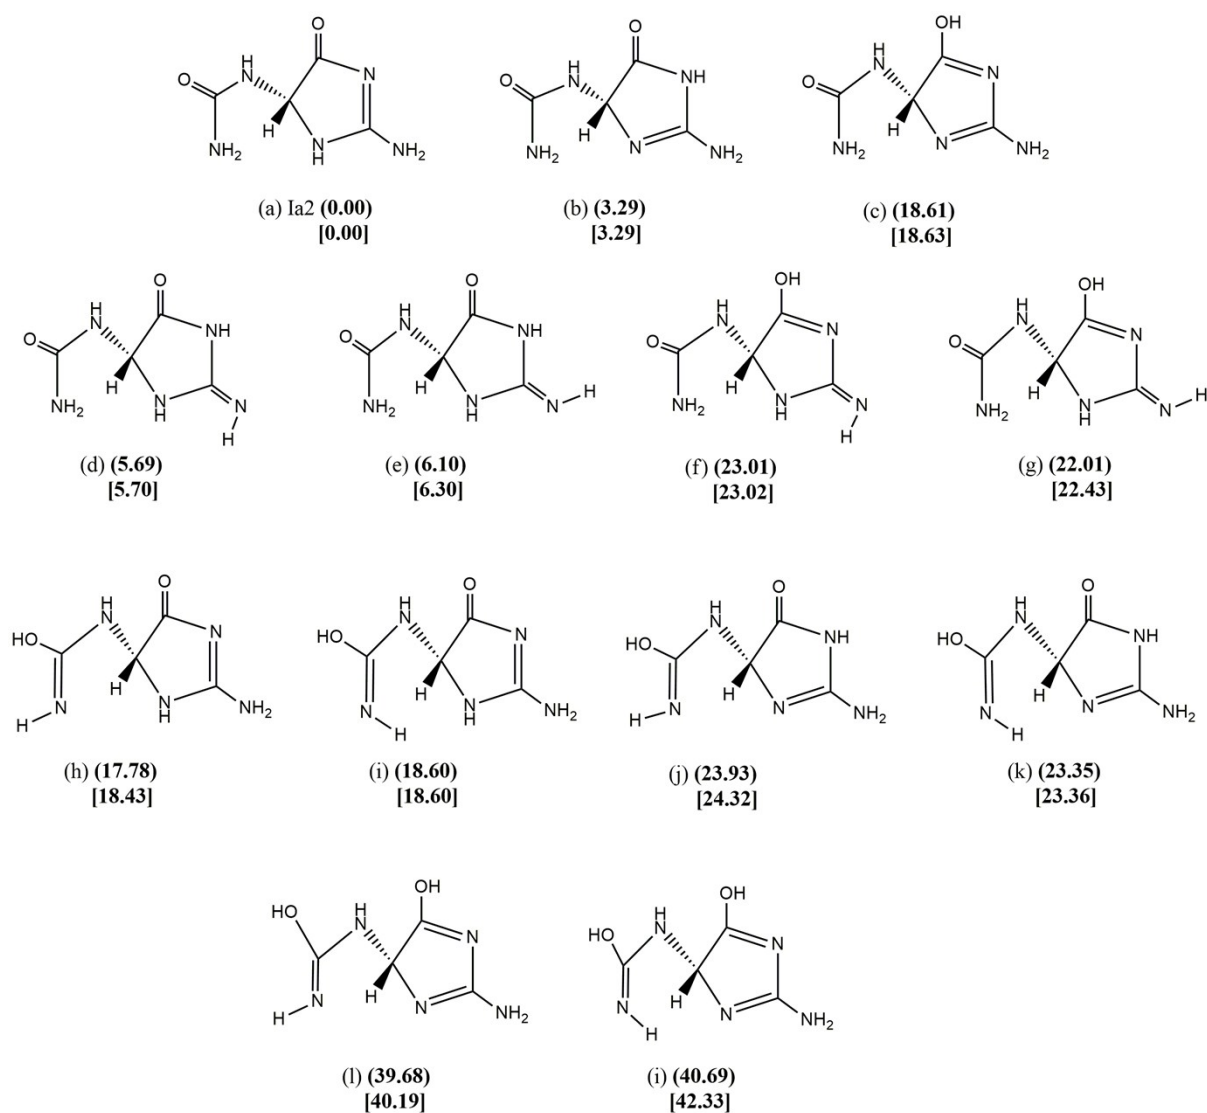

Fig. S2: Structures of different tautomers of Ia2 in the R-stereoisomeric conformation (Ia2-R). The relative ZPE-corrected total energies (kcal/mol) calculated with respect to (a) by employing B3LYP/6-31+G\* level of theory are shown in parentheses. The energies shown in brackets correspond to the equivalent tautomers of Ia2 in the S-stereoisomeric conformation (Ia2-S).

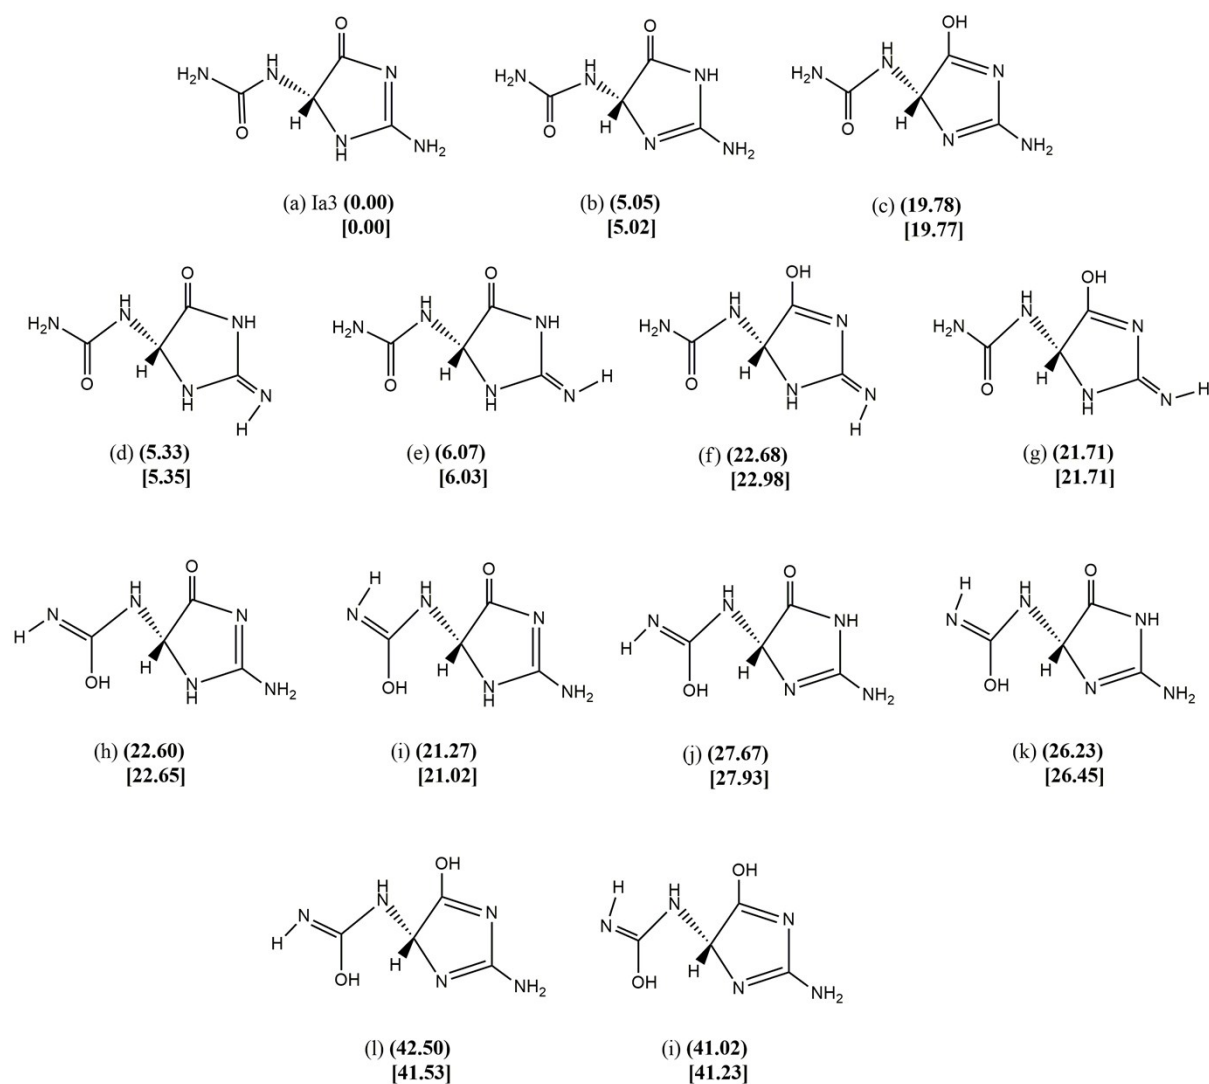

Fig. S3: Structures of different tautomers of Ia3 in the R-stereoisomeric conformation (Ia3-R). The relative ZPE-corrected total energies (kcal/mol) calculated with respect to (a) by employing B3LYP/6-31+G\* level of theory are shown in parentheses. The energies shown in brackets correspond to the equivalent tautomers of Ia3 in the S-stereoisomeric conformation (Ia3-S).

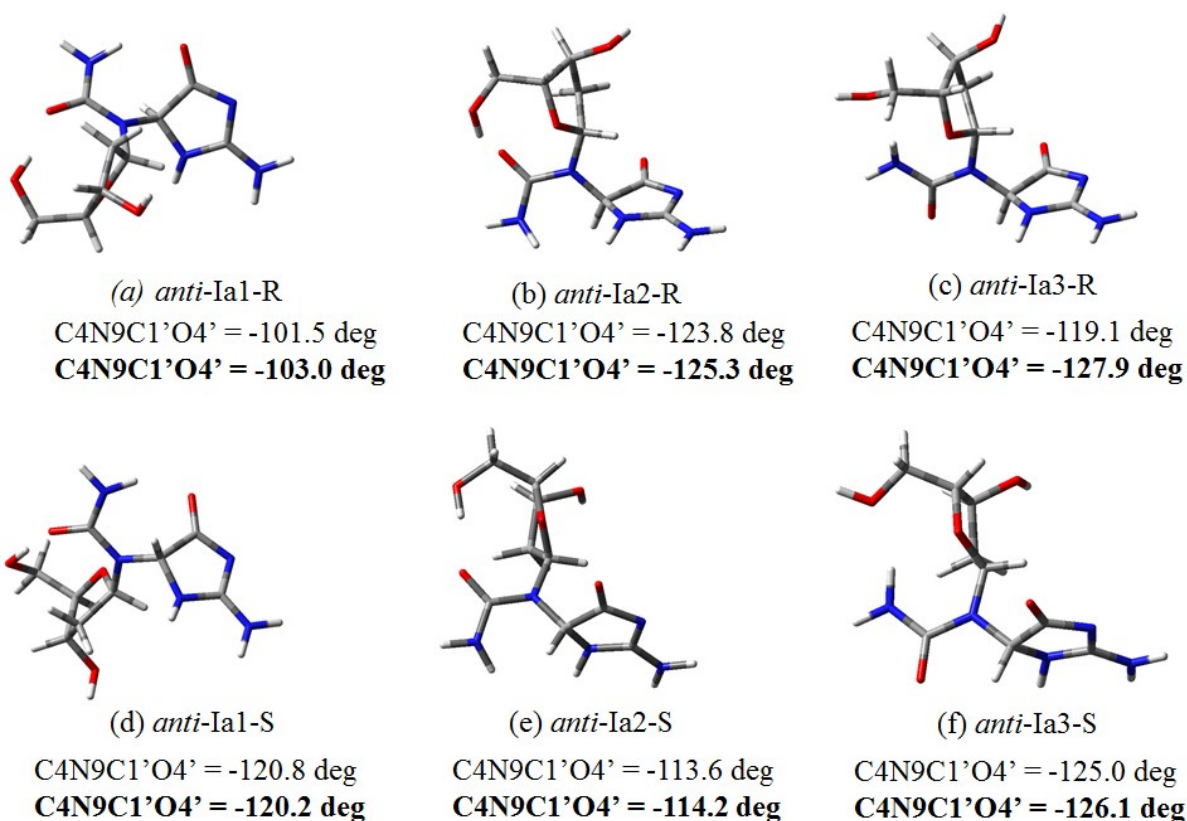

Fig. S4: Optimized structures of different rotamers of the most stable tautomer of 2'-deoxyIa in the R- and S-diastereoisomeric conformations in aqueous medium. The  $\chi$  values of these rotamers obtained at the B3LYP and B3LYP-D3 (in bold) methods are shown for comparison. As the  $\chi$  values are just higher than the permissible value of a *syn*-conformation in DNA ( $\chi = 0$  to  $90$  deg), *N*-glycosidic bond rotation from *anti*-Ia to *syn*-Ia would be easy in DNA.

Table S1: The ZPE-corrected binding energies of different complexes involving the R-stereoisomer of Ia (Ia-R) in the *anti*- and *syn*-conformations as obtained in aqueous medium by employing different level of theories. The binding energies of T:G, G:C and T:A complexes are shown in parentheses for comparison. The absence of entry shows that the corresponding complex does not exist.

| Complex       | Method              | <i>anti</i> -Ia-R  |       |        |        |        |        |        | <i>syn</i> -Ia-R |       |       |       |       |        |        |        |
|---------------|---------------------|--------------------|-------|--------|--------|--------|--------|--------|------------------|-------|-------|-------|-------|--------|--------|--------|
|               |                     | Ia11               | Ia12  | Ia13   | Ia21   | Ia22   | Ia31   | Ia32   | Ia11             | Ia12  | Ia13  | Ia21  | Ia22  | Ia31   | Ia32   | Ia33   |
| Ia:G<br>(T:G) | B3LYP               | -6.84<br>(-7.41)   | -5.07 | -10.12 | -6.80  | -10.29 | -7.40  | -10.59 | -7.61            | -2.93 | -5.10 | -5.46 | -3.59 | -7.68  | -5.85  | -7.60  |
|               | ωB97XD <sup>a</sup> | -9.88<br>(-10.82)  | -8.42 | -14.64 | -9.80  | -14.84 | -10.56 | -15.20 | -10.81           | -6.00 | -7.46 | -7.45 | -6.51 | -10.90 | -8.53  | -10.20 |
|               | ωB97XD              | -10.19<br>(-9.99)  |       |        |        |        | -10.19 | -14.11 |                  |       |       |       |       | -10.26 |        |        |
|               | B3LYP-D3            | -10.81<br>(-11.12) |       |        |        |        | -10.81 | -15.26 |                  |       |       |       |       | -11.37 |        |        |
| Ia:C<br>(G:C) | B3LYP               | -7.21<br>(-11.63)  |       |        | -7.01  |        | -6.80  |        | -3.50            |       |       | -6.09 |       | -5.96  | -10.78 | -2.42  |
|               | ωB97XD <sup>a</sup> | -10.69<br>(-16.26) |       |        | -10.49 |        | -10.61 |        | -6.53            |       |       | -9.08 |       | -8.92  | -15.90 | -4.74  |
|               | ωB97XD              | -10.23<br>(-15.16) |       |        |        |        | -10.23 |        |                  |       |       |       |       |        | -14.75 |        |
|               | B3LYP-D3            | -10.87<br>(-16.44) |       |        |        |        | -10.87 |        |                  |       |       |       |       |        | -15.95 |        |
| Ia:A<br>(T:A) | B3LYP               | -6.80<br>(-6.57)   | -2.64 | -3.74  | -6.73  |        | -6.76  |        | -2.31            |       |       | -4.84 | -3.43 | -5.75  | -5.58  | -1.47  |
|               | ωB97XD <sup>a</sup> | -9.97<br>(-10.30)  | -4.30 | -6.09  | -9.82  |        | -9.96  |        | -4.29            |       |       | -8.47 | -6.44 | -8.36  | -9.48  | -3.98  |
|               | ωB97XD              | -9.21<br>(-9.30)   |       |        |        |        | -9.21  |        |                  |       |       |       |       |        |        |        |
|               | B3LYP-D3            | -10.03<br>(-10.28) |       |        |        |        | -10.03 |        |                  |       |       |       |       |        |        |        |
| Ia:T          | B3LYP               | -6.91              | -6.80 |        | -4.88  |        | -6.89  |        | -6.29            |       |       | -6.59 | -5.40 | -6.53  | -6.20  | -6.90  |
|               | ωB97XD <sup>a</sup> | -10.03             | -9.96 |        | -10.22 |        | -11.59 |        | -8.82            |       |       | -9.13 | -8.46 | -9.19  | -8.92  | -10.12 |
|               | ωB97XD              |                    |       |        |        |        | -6.91  |        |                  |       |       |       |       |        |        | -9.96  |
|               | B3LYP-D3            |                    |       |        |        |        | -7.90  |        |                  |       |       |       |       |        |        | -11.30 |

<sup>a</sup>Obtained by single-point energy calculations by employing B3LYP/6-31+G\* geometry.

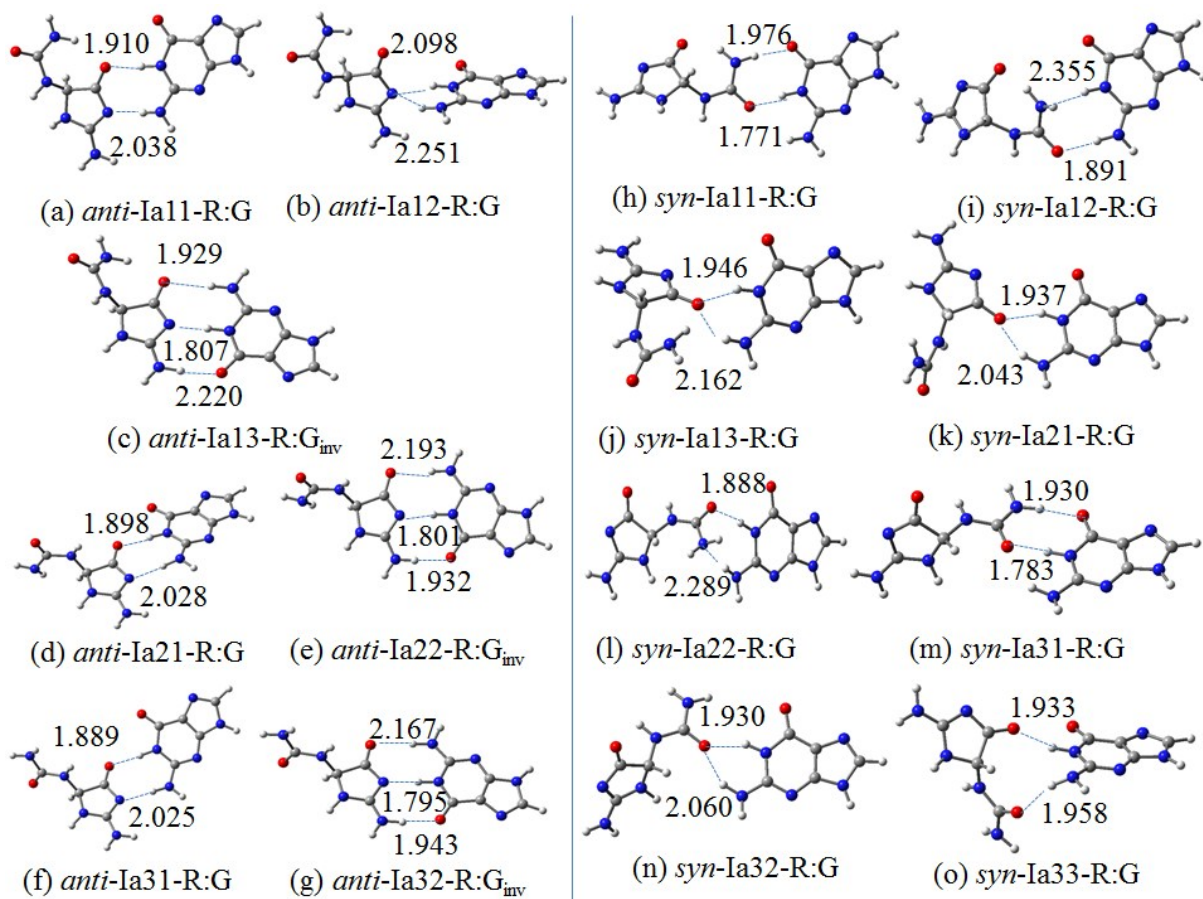

Fig. S5: Different optimized structures of Ia-R:G complexes as obtained in aqueous medium by employing B3LYP/6-31+G\* level of theory. In (c), (e), and (g) G binds with *anti*-Ia-R in the inverted orientation (G<sub>inv</sub>). We noted that these complexes can also be formed by binding of G with the inverted *anti*-Ia-R (*anti*-Ia-R<sub>inv</sub>).

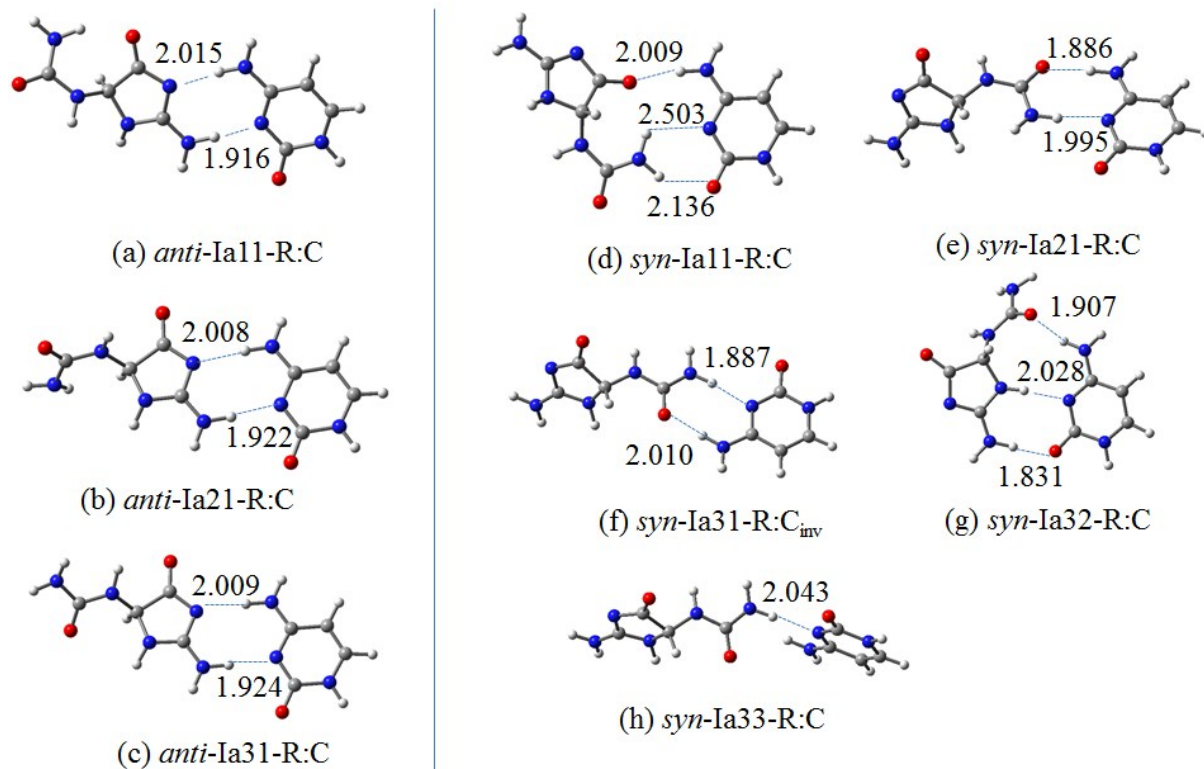

Fig. S6: Different optimized structures of Ia-R:C complexes as obtained in aqueous medium by employing B3LYP/6-31+G\* level of theory. In (f) C binds with *syn*-Ia-R in the inverted orientation (C<sub>inv</sub>). We noted that this complex can also be formed by binding of C with the inverted *syn*-Ia-R (*syn*-Ia-R<sub>inv</sub>).



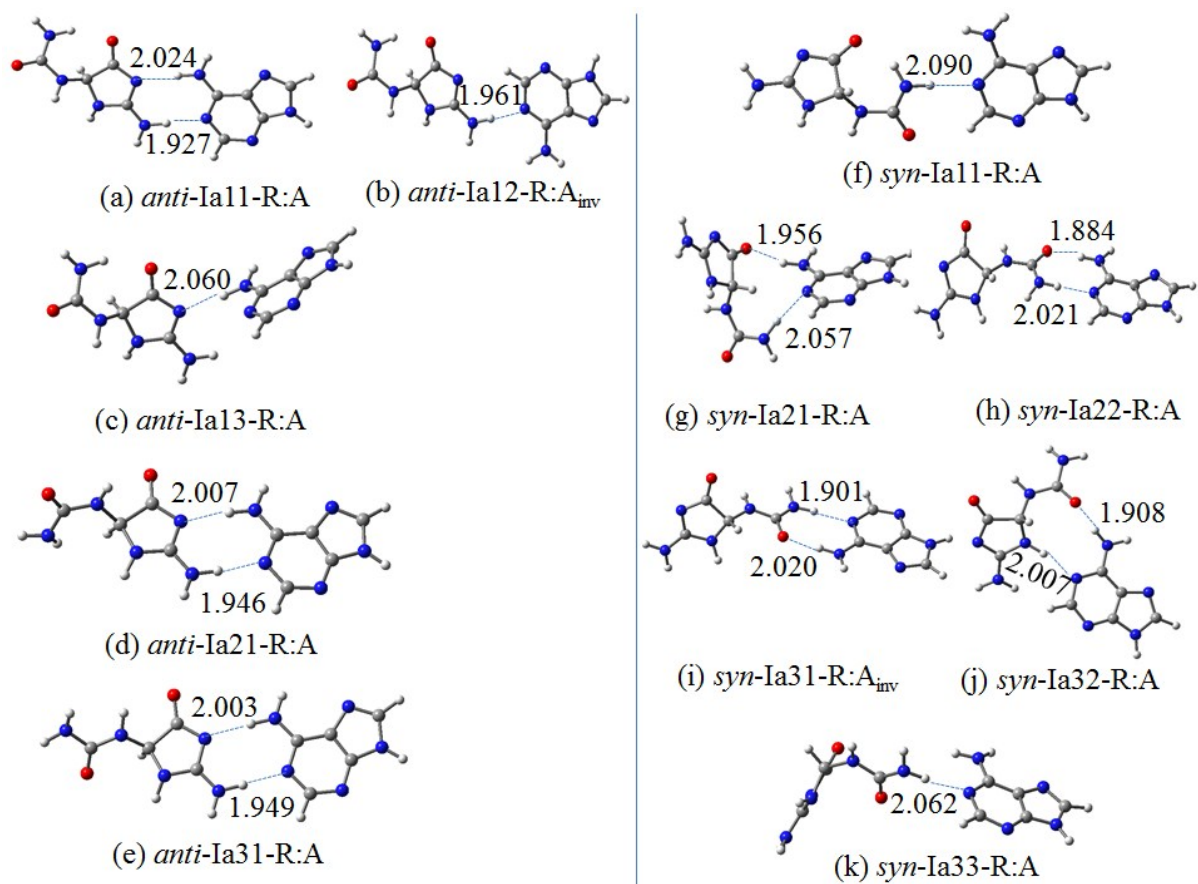

Fig. S7: Different optimized structures of Ia-R:A complexes as obtained in aqueous medium by employing B3LYP/6-31+G\* level of theory. In (b) and (i) A binds with *anti*-Ia-R and *syn*-Ia-R in the inverted orientation (A<sub>inv</sub>) respectively. We noted that these complexes can also be formed by binding of A with the inverted Ia-R in the *anti*- (*anti*-Ia-R<sub>inv</sub>) and *syn*- (*syn*-Ia-R<sub>inv</sub>) conformations respectively.

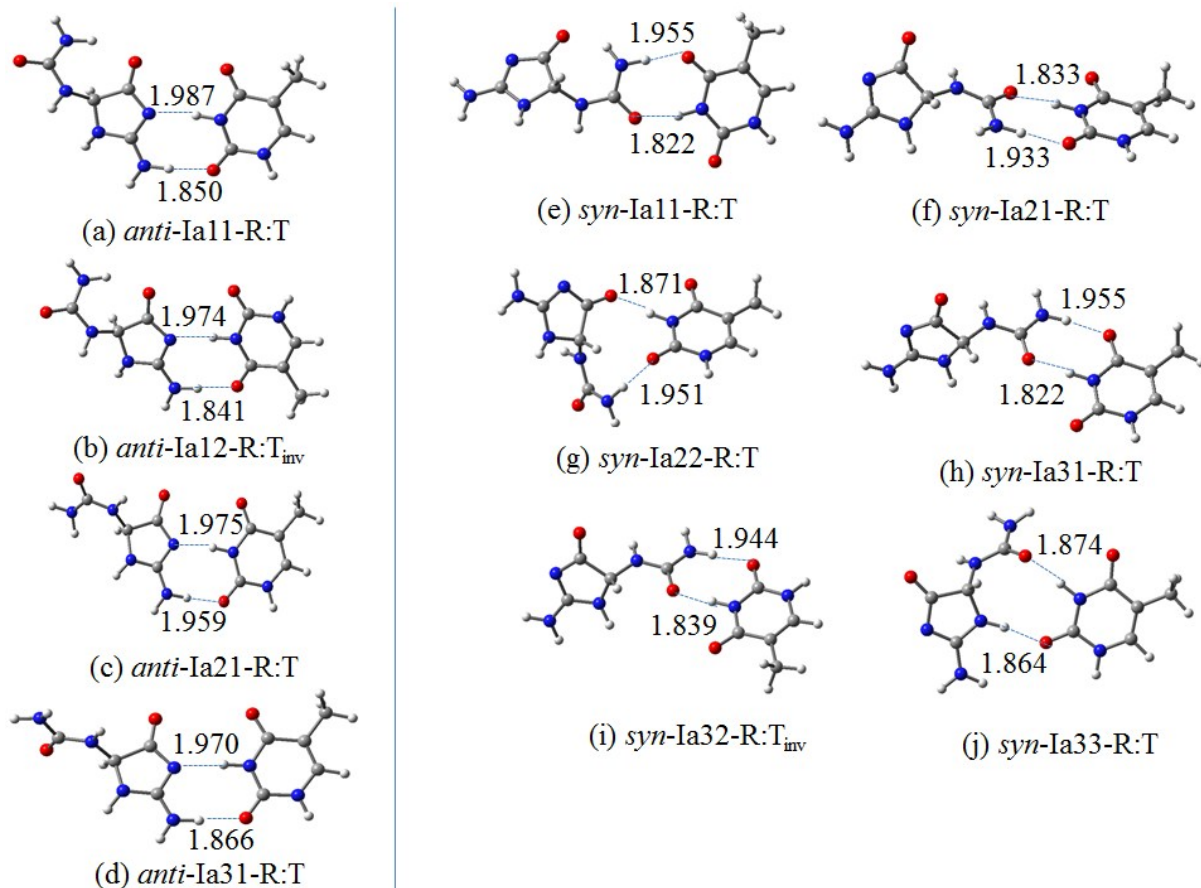

Fig. S8: Different optimized structures of Ia-R:T complexes as obtained in aqueous medium by employing B3LYP/6-31+G\* level of theory. In (b) and (i) T binds with *anti*-Ia-R and *syn*-Ia-R in the inverted orientation (T<sub>inv</sub>) respectively. We noted that these complexes can also be formed by binding of T with the inverted Ia-R in the *anti*- (*anti*-Ia-R<sub>inv</sub>) and *syn*- (*syn*-Ia-R<sub>inv</sub>) conformations respectively.

Table S2: The XYZ-coordinates of the *anti*-Ia3<sub>inv</sub>-R:G complex

|   |             |             |             |
|---|-------------|-------------|-------------|
| C | 5.65010300  | -0.38529400 | 0.15799200  |
| N | 4.33245600  | -0.23493300 | 0.53782500  |
| C | 3.33159200  | 0.22429400  | -0.37417500 |
| C | 1.97863200  | -0.53739300 | -0.26207500 |
| O | 1.86261100  | -1.76554300 | -0.28933100 |
| N | 0.96647800  | 0.35635500  | -0.13253500 |
| C | 1.50855200  | 1.59180200  | -0.11743800 |
| N | 2.86501000  | 1.59793700  | -0.14402800 |
| N | 6.49182700  | -0.83791800 | 1.13998900  |
| H | 3.73912300  | 0.11943600  | -1.38383100 |
| H | 7.48042600  | -0.76494700 | 0.93815200  |
| H | 6.24017400  | -0.75682300 | 2.11727600  |
| H | 3.40801600  | 2.40707500  | -0.42137500 |
| O | 6.03334300  | -0.17611300 | -1.00065600 |
| N | 0.74586800  | 2.67688400  | -0.05993600 |
| H | 1.14243300  | 3.60589000  | -0.01374800 |
| H | -0.27424400 | 2.55805300  | -0.02652900 |
| H | 4.06652000  | -0.39544700 | 1.50186000  |
| N | -5.70013800 | -0.87829700 | 0.15672100  |
| C | -6.15188800 | 0.42248300  | 0.24987500  |
| C | -4.33394700 | -0.82602100 | 0.05805000  |
| H | -7.20577200 | 0.64906700  | 0.33743300  |
| N | -5.17805100 | 1.30237200  | 0.21843600  |
| C | -4.02498100 | 0.54013900  | 0.09816400  |
| N | -3.49302000 | -1.87760900 | -0.05266400 |
| C | -2.65086900 | 0.91999300  | 0.02255700  |
| C | -2.22014500 | -1.50789400 | -0.12978500 |
| N | -1.81432100 | -0.19707200 | -0.09334600 |
| H | -6.26904500 | -1.71615300 | 0.16053000  |
| N | -1.24868200 | -2.44138400 | -0.28127000 |
| H | -0.25632200 | -2.21330100 | -0.22109000 |
| H | -1.51507200 | -3.41149200 | -0.18424100 |
| O | -2.15303500 | 2.06601100  | 0.04942300  |
| H | -0.79387200 | 0.00679300  | -0.12326200 |

Table S3: The XYZ-coordinates of the *anti*-Ia3-R:G complex

|   |             |             |             |
|---|-------------|-------------|-------------|
| C | 4.81871700  | -1.74555100 | 0.07470200  |
| N | 3.71986800  | -0.98423900 | 0.41754900  |
| C | 3.33468500  | 0.16156200  | -0.34340300 |
| C | 1.79670200  | 0.35789000  | -0.42067100 |
| O | 1.01281100  | -0.53727800 | -0.75071200 |
| N | 1.47000200  | 1.62831900  | -0.06737300 |
| C | 2.62189100  | 2.24893800  | 0.25837700  |
| N | 3.71871100  | 1.45297900  | 0.23504400  |
| N | 5.08082300  | -2.80153500 | 0.90718000  |
| H | 3.75102100  | 0.05364200  | -1.34904000 |
| H | 5.98187400  | -3.24450400 | 0.78442300  |
| H | 4.70305300  | -2.83306600 | 1.84605200  |
| H | 4.66258300  | 1.81405400  | 0.16749700  |
| O | 5.48518100  | -1.52122400 | -0.94437900 |
| N | 2.66405900  | 3.53597300  | 0.59227100  |
| H | 3.52102500  | 3.99330600  | 0.87404400  |
| H | 1.80743700  | 4.07356100  | 0.60419500  |
| H | 3.23866500  | -1.15858700 | 1.29149100  |
| N | -5.71873200 | 0.27322300  | 0.30166100  |
| C | -6.06767400 | -1.06052300 | 0.37196200  |
| C | -4.36430500 | 0.32533800  | 0.09387200  |
| H | -7.09206500 | -1.36823800 | 0.53199800  |
| N | -5.03793300 | -1.86259100 | 0.22434700  |
| C | -3.95660100 | -1.01097200 | 0.04824600  |
| N | -3.60895400 | 1.43863400  | -0.03015900 |
| C | -2.56929000 | -1.29379700 | -0.16036400 |
| C | -2.32335900 | 1.17352200  | -0.22809600 |
| N | -1.81743800 | -0.10638500 | -0.29260100 |
| H | -6.34341000 | 1.06556900  | 0.38760300  |
| O | -2.00643200 | -2.39683500 | -0.23221500 |
| N | -1.44886900 | 2.19376500  | -0.42078200 |
| H | -0.44191000 | 2.05581400  | -0.27885200 |
| H | -1.80676000 | 3.11696600  | -0.21128700 |
| H | -0.80934400 | -0.24125700 | -0.46739400 |

Table S4: The XYZ-coordinates of the *syn*-Ia3-R:G complex

|   |             |             |             |
|---|-------------|-------------|-------------|
| C | 1.29533400  | -1.10601700 | -0.14663600 |
| N | 2.64284100  | -1.24842800 | 0.07043400  |
| C | 3.45099000  | -0.11245500 | 0.40732700  |
| C | 4.85415000  | -0.53000700 | 0.93789300  |
| O | 5.01340000  | -1.37982800 | 1.81290900  |
| N | 5.82130100  | 0.17410300  | 0.28136000  |
| C | 5.18892400  | 0.93396000  | -0.62651400 |
| N | 3.84243900  | 0.73885200  | -0.71654600 |
| N | 0.61371200  | -2.20562300 | -0.54787600 |
| H | 2.92550100  | 0.48137500  | 1.16077400  |
| H | -0.40839400 | -2.15419400 | -0.59669100 |
| H | 1.03328100  | -3.12540400 | -0.50792500 |
| H | 3.21601100  | 1.45250800  | -1.07034600 |
| O | 0.74412500  | 0.00826700  | 0.01419400  |
| N | 5.83584700  | 1.80555000  | -1.40111100 |
| H | 5.36863300  | 2.33886200  | -2.12173700 |
| H | 6.83909600  | 1.89569400  | -1.31274300 |
| H | 3.11192300  | -2.09351700 | -0.23199700 |
| N | -5.92842800 | 0.81082400  | 0.22747900  |
| C | -6.35863800 | -0.44683000 | -0.14408700 |
| C | -4.55905800 | 0.79393400  | 0.19859500  |
| H | -7.41108600 | -0.68952300 | -0.19893900 |
| N | -5.36644100 | -1.26613400 | -0.40762400 |
| C | -4.22488800 | -0.50676400 | -0.19967700 |
| N | -3.73173000 | 1.82071700  | 0.49906300  |
| C | -2.84163000 | -0.84257600 | -0.31473100 |
| C | -2.45456500 | 1.49496800  | 0.37862900  |
| N | -2.02115900 | 0.25130300  | -0.00495300 |
| H | -6.51286100 | 1.60001900  | 0.47480200  |
| N | -1.48476400 | 2.42940800  | 0.59163900  |
| H | -1.76523100 | 3.26319900  | 1.09169800  |
| H | -0.53362100 | 2.11798700  | 0.75177900  |
| O | -2.32424600 | -1.93076800 | -0.63652400 |
| H | -0.99852500 | 0.08834600  | -0.05116500 |

Table S5: The ZPE-corrected binding energies of different complexes involving the S-stereoisomer of Ia (Ia-S) in the *anti*- and *syn*-conformations as obtained in aqueous medium. The absence of entry shows that the corresponding complex does not exist.

| Complex | Method              | <i>anti</i> -Ia-S |       |        |        |        |               |               | <i>syn</i> -Ia-S |       |       |       |       |               |               |       |
|---------|---------------------|-------------------|-------|--------|--------|--------|---------------|---------------|------------------|-------|-------|-------|-------|---------------|---------------|-------|
|         |                     | Ia11              | Ia12  | Ia13   | Ia21   | Ia22   | Ia31          | Ia32          | Ia11             | Ia12  | Ia13  | Ia21  | Ia22  | Ia31          | Ia32          | Ia33  |
| Ia:G    | B3LYP               | -6.96             | -4.94 | -10.12 | -7.02  | -10.39 | -7.40         | -10.51        | -7.63            | -3.32 | -5.11 | -6.76 | -3.11 | -7.68         | -5.80         | -7.26 |
|         | ωB97XD <sup>a</sup> | -10.03            | -8.26 | -14.64 | -11.23 | -14.94 | <b>-10.56</b> | <b>-15.09</b> | -11.30           | -6.52 | -7.45 | -7.44 | -6.05 | <b>-10.90</b> | -8.39         | -9.72 |
|         | ωB97XD              |                   |       |        |        |        | <b>-10.19</b> | <b>-14.09</b> |                  |       |       |       |       | <b>-10.27</b> |               |       |
|         | B3LYP-D3            |                   |       |        |        |        | <b>-10.81</b> | <b>-15.25</b> |                  |       |       |       |       | <b>-11.37</b> |               |       |
| Ia:C    | B3LYP               | -7.21             |       |        | -7.01  |        | -7.00         |               | -2.26            |       |       | -6.09 | -5.90 | -5.97         | -10.71        | -2.48 |
|         | ωB97XD <sup>a</sup> | -10.69            |       |        | -10.49 |        | <b>-10.51</b> |               | -4.64            |       |       | -9.08 | -8.21 | -8.93         | <b>-15.13</b> | -4.81 |
|         | ωB97XD              |                   |       |        |        |        | <b>-10.35</b> |               |                  |       |       |       |       |               | <b>-14.68</b> |       |
|         | B3LYP-D3            |                   |       |        |        |        | <b>-10.87</b> |               |                  |       |       |       |       |               | <b>-15.89</b> |       |
| Ia:A    | B3LYP               | -6.80             | -3.74 |        | -6.73  |        | -6.77         |               | -2.31            |       |       | -5.95 | -4.49 | -5.75         | -6.03         | -2.75 |
|         | ωB97XD <sup>a</sup> | -9.97             | -6.09 |        | -9.82  |        | <b>-9.96</b>  |               | -4.28            |       |       | -8.48 | -7.97 | -8.36         | -9.74         | -4.48 |
|         | ωB97XD              |                   |       |        |        |        | <b>-9.21</b>  |               |                  |       |       |       |       |               |               |       |
|         | B3LYP-D3            |                   |       |        |        |        | <b>-10.02</b> |               |                  |       |       |       |       |               |               |       |
| Ia:T    | B3LYP               | -6.92             | -6.79 |        | -4.88  |        | -6.90         |               | -6.30            |       |       | -6.29 | -5.71 | -9.46         | -6.19         | -6.65 |
|         | ωB97XD <sup>a</sup> | -10.03            | -9.95 |        | -10.22 |        | <b>-10.11</b> |               | -8.83            |       |       | -8.71 | -8.84 | <b>-11.10</b> | -8.79         | -9.67 |
|         | ωB97XD              |                   |       |        |        |        | <b>-9.56</b>  |               |                  |       |       |       |       | <b>-8.71</b>  |               |       |
|         | B3LYP-D3            |                   |       |        |        |        | <b>-10.35</b> |               |                  |       |       |       |       | <b>-9.65</b>  |               |       |

<sup>a</sup>Obtained by single-point energy calculations by employing B3LYP/6-31+G\* geometry.

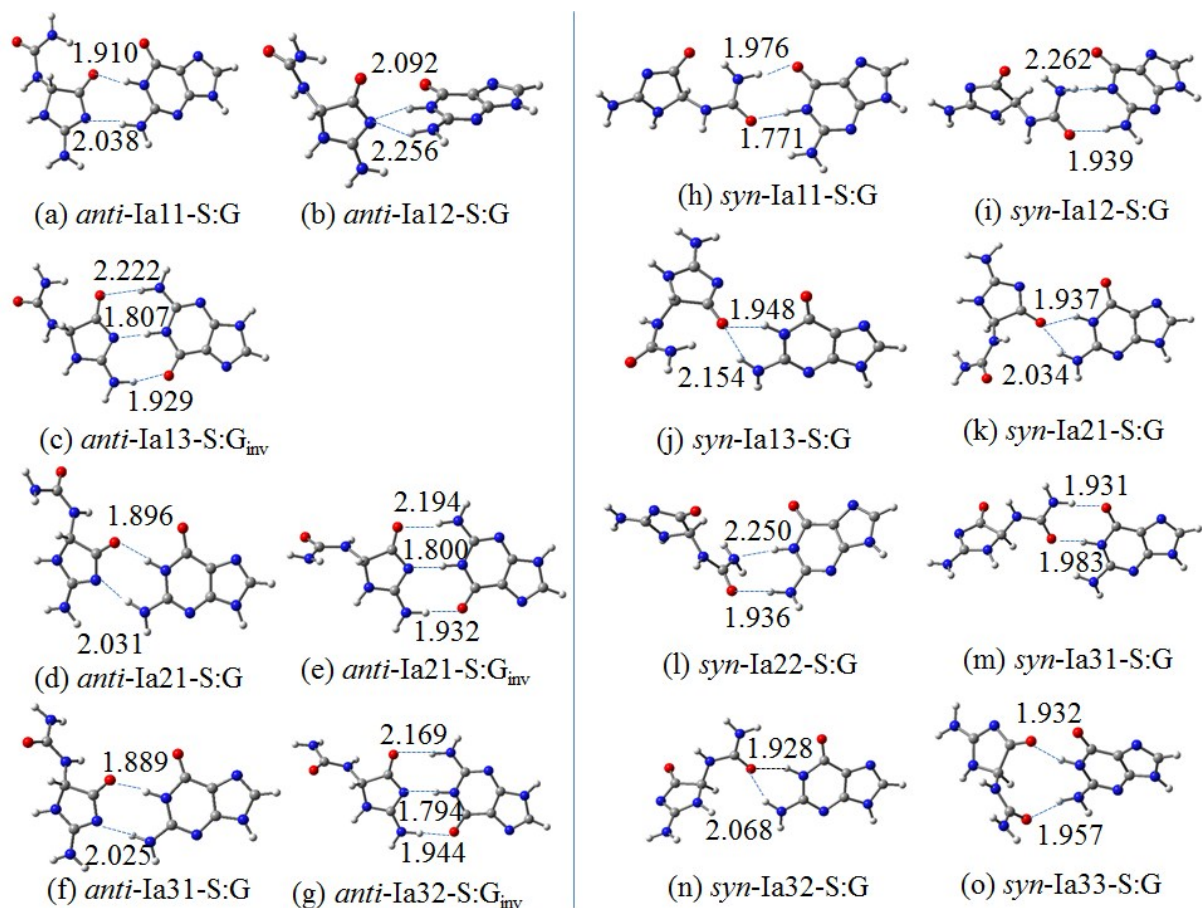

Fig. S9: Different optimized structures of Ia-S:G complexes as obtained in aqueous medium by employing B3LYP/6-31+G\* level of theory. In (c), (e), and (g) G binds with *anti*-Ia-S in the inverted orientation (G<sub>inv</sub>). We noted that these complexes can also be formed by binding of G with the inverted *anti*-Ia-S (*anti*-Ia-S<sub>inv</sub>).

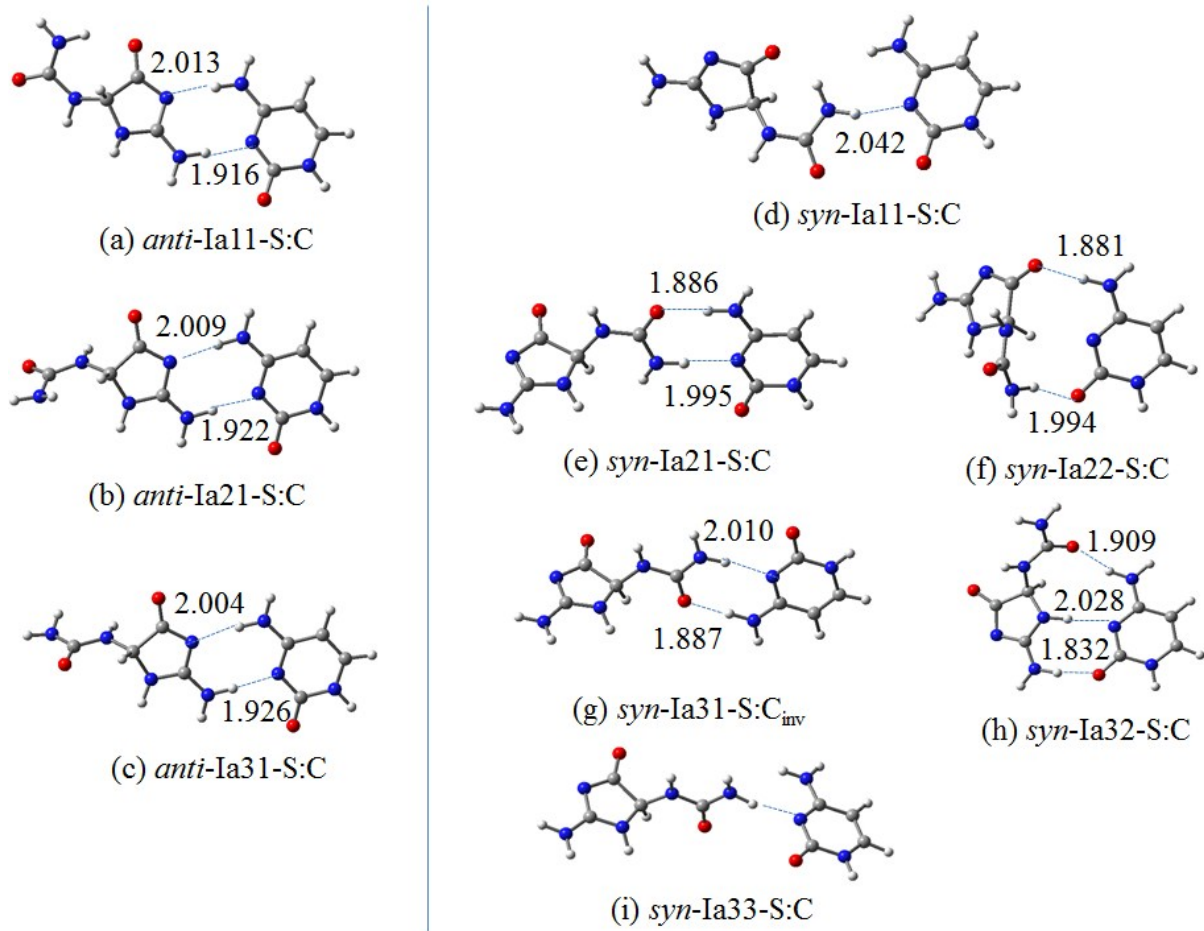

Fig. S10: Different optimized structures of Ia-S:C complexes as obtained in aqueous medium by employing B3LYP/6-31+G\* level of theory. In (g), C binds with *syn*-Ia in the inverted orientation (C<sub>inv</sub>). We noted that this complex can also be formed by binding of C with the inverted *syn*-Ia-S (*syn*-Ia-S<sub>inv</sub>).



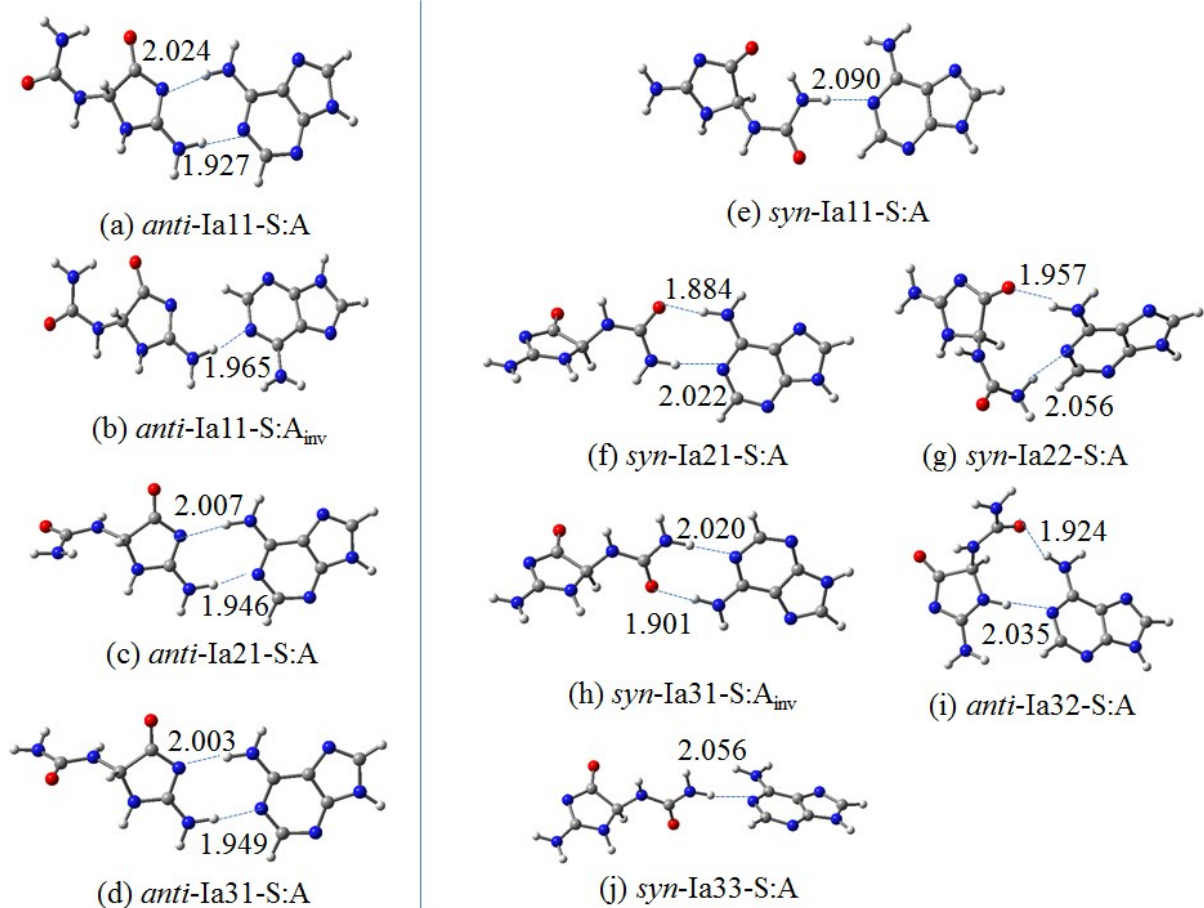

Fig. S11: Different optimized structures of Ia-S:A complexes as obtained in aqueous medium by employing B3LYP/6-31+G\* level of theory. In (b) and (h), A binds with *anti*-Ia-S and *syn*-Ia-S in the inverted orientation (A<sub>inv</sub>) respectively. We noted that these complexes can also be formed by binding of A with the inverted Ia-S in the *anti*- (*anti*-Ia-S<sub>inv</sub>) and *syn*- (*syn*-Ia-S<sub>inv</sub>) conformations respectively.

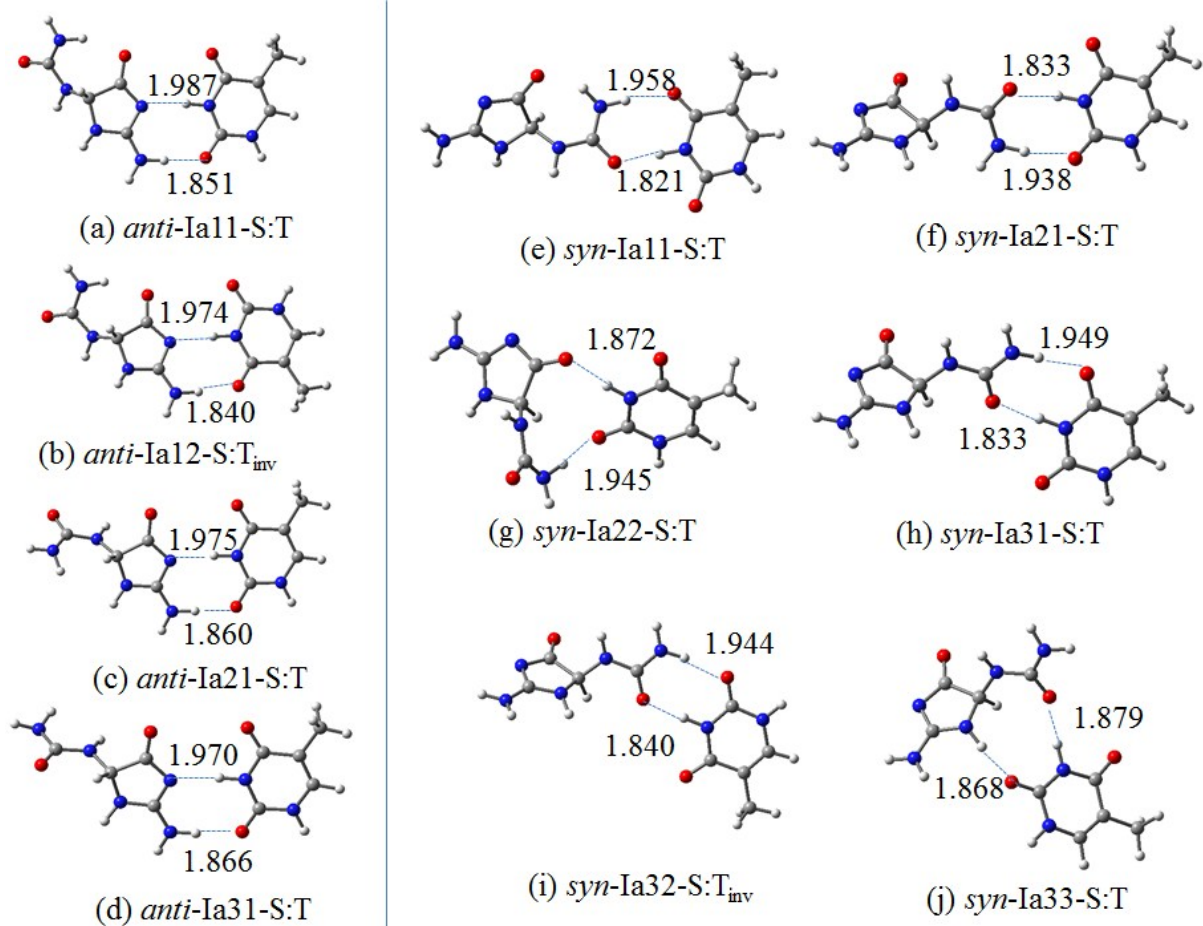

Fig. S12: Different optimized structures of Ia-S:T complexes as obtained in the aqueous medium by employing B3LYP/6-31+G\* level of theory. In (b) and (i) T binds with *anti*-Ia-S and *syn*-Ia-S in the inverted orientation (T<sub>inv</sub>) respectively. We noted that these complexes can also be formed by binding of T with the inverted Ia-S in the *anti*- (*anti*-Ia-S<sub>inv</sub>) and *syn*- (*syn*-Ia-S<sub>inv</sub>) conformations respectively.
